# Supplementary material
Source: publisher site journal article supplement (https://www.dovepress.com/get_supplementary_file.php?f=262245.xlsx)
Supplement: Supplementary file 1 [file get_supplementary_file.php]

## Sheet: Clinical Data
Supplemental Table 1: clinical data
TARGET USI	Gender	Race	Ethnicity	Age at Diagnosis in Days	First Event	Event Free Survival Time in Days	Vital Status	Overall Survival Time in Days	Year of Diagnosis	Year of Last Follow Up	Protocol	Disease at diagnosis	Metastasis site	Primary tumor site	Specific tumor site	Specific tumor side	Specific tumor region	Definitive Surgery	Primary site progression	Site of initial relapse	Time to first relapse in days	Time to first enrollment on relapse protocol in days	Time to first SMN in days	Time to death in days	Histologic response	Percent necrosis at Definitive Surgery	Relapse Type	NF2
TARGET-40-PALWWX	Female	White	Not Hispanic or Latino	4464	Censored	2163	Alive	2163	2002	2008	AOST0121	Metastatic	Lung only	Leg/foot	Femur	Right	Distal	Limb sparing								98		4658
TARGET-40-PAMEKS	Male	Asian	Not Hispanic or Latino	3942	Relapse	385	Dead	857	2003	2005	AOST0121	Metastatic	Lung only	Leg/foot	Femur	Right	Distal	Limb sparing		Lung	385			857		50		2563
TARGET-40-PAMLKS	Female	White	Not Hispanic or Latino	4509	Relapse	71	Dead	180	2003	2004	AOST0121	Metastatic	Bone and lung	Leg/foot	Femur	Right	Distal				71			180				1579
TARGET-40-PAMRHD	Female	Unknown	Not Hispanic or Latino	3942	Relapse	39	Dead	74	2003	2003	AOST0121	Metastatic	Bone and lung	Leg/foot	Femur	Right	Distal			Lung	39			74				2645
TARGET-40-PAMYYJ	Male	White	Not Hispanic or Latino	6477	Relapse	128	Dead	271	2004	2005	AOST0121	Metastatic	Lung only	Leg/foot	Leg NOS					Lung	128			271		67		7122
TARGET-40-PANMIG	Male	White	Not Hispanic or Latino	5360	Relapse	513	Dead	776	2005	2007	AOST0121	Metastatic	Lung only	Leg/foot	Tibia	Right	Proximal	Limb sparing		Lung	513			776		95		5239
TARGET-40-PANPUM	Male	White	Not Hispanic or Latino	5996	Relapse	46	Dead	295	2005	2006	AOST0121	Metastatic	Lung only	Pelvis	Ilium	Left					46			295				5127
TARGET-40-PANZHX	Female	Asian	Not Hispanic or Latino	5127	Relapse	812	Alive	1323	2005	2009	AOST0121	Metastatic	Bone and lung	Leg/foot	Tibia	Left		Limb sparing		Non-bone, non-lung	812					70		1566
TARGET-40-PAPIJR	Female	White	Hispanic or Latino	4597	None	1719	Alive	1719	2006	2010	AOST0331	Non-metastatic (confirmed)		Leg/foot	Femur		Distal	Limb sparing							0-90			2180
TARGET-40-PAPKWD	Male	White	Not Hispanic or Latino	3478	Relapse	192	Dead	422	2006	2007	AOST0331	Non-metastatic (confirmed)		Leg/foot	Femur		Distal	Limb sparing	No	Non-bone, non-lung	192			422	0-90			1884
TARGET-40-PAPNVD	Female	White	Hispanic or Latino	5289	Relapse	594	Dead	922	2006	2009	AOST0331	Non-metastatic (confirmed)		Leg/foot	Fibula		Proximal	Limb sparing	Yes		594			922	0-90			707
TARGET-40-PAPWWC	Female	White	Not Hispanic or Latino	3595	Relapse	1933	Alive	2520	2006	2013	AOST0331	Non-metastatic (confirmed)		Leg/foot	Femur		Distal	Limb sparing	No	Lung	1933				0-90			6421
TARGET-40-PAPXGT	Female	Black or African American	Not Hispanic or Latino	4172	None	2526	Alive	2526	2006	2013	AOST0331	Non-metastatic (confirmed)		Leg/foot	Tibia		Proximal	Limb sparing							0-90			5617
TARGET-40-PARBGW	Female	Unknown	Hispanic or Latino	4634	None	286	Alive	286	2007	2007	AOST0331	Metastatic (confirmed)	Bone only	Leg/foot	Femur		Distal	Limb sparing							0-90			531
TARGET-40-PARDAX	Male	White	Not Hispanic or Latino	3680	Relapse	105	Dead	679	2007	2009	AOST0331	Metastatic (confirmed)	Lung only	Leg/foot	Femur		Distal		Yes	Other bone	105		582	679				1969
TARGET-40-PARFTG	Female	Asian	Not Hispanic or Latino	4987	Relapse	53	Dead	653	2007	2009	AOST0331	Non-metastatic (confirmed)		Leg/foot	Femur		Distal	Limb sparing	Yes		53			653	0-90			1176
TARGET-40-PARGTM	Male	White	Not Hispanic or Latino	5925	None	2610	Alive	2610	2007	2014	AOST0331	Non-metastatic (confirmed)		Leg/foot	Tibia		Proximal	Limb sparing							91-100			4699
TARGET-40-PARJXU	Female	White	Not Hispanic or Latino	4624	Relapse	811	Dead	1631	2007	2012	AOST0331	Metastatic (confirmed)	Lung only	Leg/foot	Femur		Distal	Limb sparing	No		811			1631	91-100			3064
TARGET-40-PARKAF	Male	White	Not Hispanic or Latino	6085	Relapse	56	Dead	1061	2007	2010	AOST0331	Non-metastatic (confirmed)		Leg/foot	Femur		Distal	Limb sparing	Yes		56			1061	0-90			2639
TARGET-40-PASEBY	Male	White	Not Hispanic or Latino	4249	Relapse	42	Alive	2049	2008	2014	AOST0331	Non-metastatic (confirmed)		Leg/foot	Femur		Distal		Yes		42							3384
TARGET-40-PASEFS	Male	White	Not Hispanic or Latino	6625	None	2112	Alive	2112	2008	2014	AOST0331	Non-metastatic (confirmed)		Leg/foot	Tibia		Proximal	Limb sparing							0-90			5266
TARGET-40-PASFCV	Female	White	Not Hispanic or Latino	3849	None	2062	Alive	2062	2008	2014	AOST0331	Non-metastatic (confirmed)		Leg/foot	Tibia		Proximal	Amputation							0-90			3940
TARGET-40-PASKZZ	Female	White	Hispanic or Latino	4808	None	542	Alive	542	2009	2010	AOST0331	Non-metastatic (confirmed)		Leg/foot	Fibula		Proximal	Limb sparing							91-100			2730
TARGET-40-PASSLM	Male	White	Not Hispanic or Latino	3538	Relapse	1865	Alive	1865	2009	2014	AOST0331	Metastatic (confirmed)	Lung only	Arm/hand	Humerus		Proximal	Amputation	No		1865				91-100			6240
TARGET-40-PASUUH	Female	White	Not Hispanic or Latino	5143	None	1625	Alive	1625	2009	2013	AOST0331	Non-metastatic (confirmed)		Leg/foot	Fibula		Proximal	Limb sparing							91-100			3553
TARGET-40-PASYUK	Female	Unknown	Hispanic or Latino	5931	None	1870	Alive	1870	2009	2014	AOST0331	Non-metastatic (confirmed)		Leg/foot	Tibia		Proximal	Limb sparing							91-100			2946
TARGET-40-PATAWV	Male	White	Not Hispanic or Latino	5667	None	1702	Alive	1702	2009	2014	AOST0331	Non-metastatic (confirmed)		Leg/foot	Tibia		Proximal	Limb sparing							91-100			4176
TARGET-40-PATJVI	Male	White	Not Hispanic or Latino	5755	None	1575	Alive	1575	2010	2014	AOST0331	Metastatic (confirmed)	Lung only	Leg/foot	Fibula		Proximal	Limb sparing							91-100			3602
TARGET-40-PATKSS	Male	White	Not Hispanic or Latino	4889	Relapse	63	Dead	758	2010	2012	AOST0331	Non-metastatic (confirmed)		Pelvis	Pelvis / Sacrum			Limb sparing	Yes		63			758	0-90			1900
TARGET-40-PATMIF	Female	White	Not Hispanic or Latino	4383	None	1580	Alive	1580	2010	2014	AOST0331	Non-metastatic (confirmed)		Leg/foot	Femur		Distal	Limb sparing							91-100			5845
TARGET-40-PATMPU	Male	Unknown	Unknown	5060	Relapse	498	Dead	1579	2010	2014	AOST0331	Non-metastatic (confirmed)		Leg/foot	Fibula		Proximal	Limb sparing	No	Non-bone, non-lung	498			1579	0-90			9163
TARGET-40-PATPBS	Male	White	Not Hispanic or Latino	5513	None	1468	Alive	1468	2010	2014	AOST0331	Non-metastatic (confirmed)		Leg/foot	Fibula		Proximal	Limb sparing							91-100			8431
TARGET-40-PASNZV	Male	White	Not Hispanic or Latino	5947	None	1747	Alive	1747	2009	2014	AOST06B1	Non-metastatic (confirmed)		Leg/foot	Femur													3999
TARGET-40-PASRNE	Female	White	Not Hispanic or Latino	1299	Relapse	512	Alive	1707	2009	2014	AOST06B1	Non-metastatic (confirmed)		Leg/foot	Femur						512							1916
TARGET-40-PATEEM	Male	White	Not Hispanic or Latino	5875	Relapse	961	Alive	1451	2009	2013	AOST06B1	Non-metastatic (confirmed)		Arm/hand	Humerus						961							9251
TARGET-40-PATUXZ	Female	Unknown	Hispanic or Latino	6345	Death	510	Dead	510	2010	2012	AOST06B1	Metastatic (confirmed)	Bone and lung	Leg/foot	Femur									510				2430
TARGET-40-PAUBIT	Female	White	Not Hispanic or Latino	4513	None	1029	Alive	1029	2011	2014	AOST06B1	Non-metastatic (confirmed)		Leg/foot	Femur													6808
TARGET-40-PAUTWB	Male	White	Not Hispanic or Latino	5064	Relapse	598	Alive	687	2012	2014	AOST06B1	Non-metastatic (confirmed)		Leg/foot	Tibia						598							3211
TARGET-40-PAUTYB	Female	White	Hispanic or Latino	4418	Relapse	527	Dead	537	2012	2013	AOST06B1	Non-metastatic (confirmed)		Leg/foot	Tibia						527			537				3081
TARGET-40-PAUVUL	Female	Black or African American	Not Hispanic or Latino	2027	Relapse	237	Dead	347	2012	2013	AOST06B1	Metastatic (confirmed)	Lung only	Leg/foot	Femur						237			347				3111
TARGET-40-PAUXPZ	Female	Unknown	Unknown	4507	Relapse	419	Dead	606	2012	2014	AOST06B1	Metastatic (confirmed)	Lung only	Leg/foot	Tibia						419			724				580
TARGET-40-PAUYTT	Female	White	Not Hispanic or Latino	6702	None	579	Alive	579	2012	2014	AOST06B1	Non-metastatic (confirmed)		Leg/foot	Fibula													1245
TARGET-40-PAVALD	Male	White	Hispanic or Latino	5924	None	551	Alive	551	2012	2014	AOST06B1	Non-metastatic (confirmed)		Leg/foot	Femur													7258
TARGET-40-PAVCLP	Female	Black or African American	Not Hispanic or Latino	4062	None	511	Alive	511	2012	2014	AOST06B1	Non-metastatic (confirmed)		Leg/foot	Tibia													3342
TARGET-40-PAVDTY	Male	White	Not Hispanic or Latino	4898	None	369	Alive	369	2012	2013	AOST06B1	Non-metastatic (confirmed)		Leg/foot	Tibia													1621
TARGET-40-PAVECB	Female	White	Not Hispanic or Latino	3272	None	476	Alive	476	2012	2014	AOST06B1	Non-metastatic (confirmed)		Arm/hand	Radius													3921
TARGET-40-PATMXR	Female	Unknown	Hispanic or Latino	7631	Relapse	68	Dead	386	2010	2011	AOST06P1	Metastatic	Bone and lung	Leg/foot	Femur				Yes		68			386				4805
TARGET-40-0A4HLD	Male			7254	Censored	3946	Alive	3946	2000	2011	IHRT	Non-metastatic (confirmed)		Leg/Foot	Tibia		Proximal	Limb sparing	No						Stage 3/4	99		1512
TARGET-40-0A4HMC	Male	White		10205	Censored	377	Alive	377			IHRT	Non-metastatic (confirmed)		Leg/Foot	Fibula		Other, Not specified	Amputation	No						Stage 1/2	60		4422
TARGET-40-0A4HX8	Male	White		10635	Censored	3050	Alive	1750	2003	2011	IHRT	Non-metastatic (confirmed)		Leg/Foot	Femur		Distal	Limb sparing	No						Stage 3/4	100		2845
TARGET-40-0A4HXS	Male	White		8470	Censored	2948	Alive	2948	2004	2014	IHRT	Non-metastatic (confirmed)		Leg/Foot	Femur		Distal	Limb sparing	No						Stage 1/2	40		3768
TARGET-40-0A4HY5	Male			7264	Relapse	218	Dead	290	2004	2005	IHRT	Metastatic	Lung only	Leg/Foot	Pelvis		Other, Posterior	Limb sparing	No	Regional Lymph nodes	218			290	Stage 1/2	50		3607
TARGET-40-0A4I0Q	Female			7269	Death	519	Dead	519	2005	2006	IHRT	Metastatic	Lung only	Leg/Foot	Femur		Distal	Limb sparing	No					519	Stage 1/2	< 50		9125
TARGET-40-0A4I0S	Male			9114	Censored	603	Alive	603	2006	2008	IHRT	Non-metastatic (confirmed)		Leg/Foot	Pelvis		Other, Anterior	Limb sparing	No									6574
TARGET-40-0A4I0W	Male	Asian		7330	Censored	683	Alive	683	2006	2010	IHRT	Non-metastatic (confirmed)		Leg/Foot	Femur		Distal	Limb sparing	No									7079
TARGET-40-0A4I3S	Male	Black or African American		8313	Censored	1844	Alive	1844	2007	2014	IHRT	Non-metastatic (confirmed)		Leg/Foot	Pelvis - ilium		Other, Posterior	Limb sparing	No									15234
TARGET-40-0A4I42	Female			6268	Relapse	351	Dead	619	2007	2009	IHRT	Non-metastatic (confirmed)		Arm/hand	Humerus		Proximal	Limb sparing	No		351			619			Systemic	4848
TARGET-40-0A4I48	Female			5854	Censored	1616	Alive	1616	2008	2014	IHRT	Metastatic	Lung only	Leg/Foot	Femur		Distal	Limb sparing	No						Stage 3/4	99		6479
TARGET-40-0A4I4E	Male			5978					2009		IHRT	Metastatic	Lung only	Leg/Foot	Femur		Proximal	NA - No surgery	No									1805
TARGET-40-0A4I4M	Female	Asian		6916	Censored	708	Alive	708	2010	2014	IHRT	Non-metastatic (confirmed)		Leg/Foot	Tibia		Proximal	Limb sparing	No						Stage 3/4	98		3621
TARGET-40-0A4I4O	Male	White		11828	Relapse	235	Dead	627	2010	2012	IHRT	Non-metastatic (confirmed)		Leg/Foot	Femur		Distal	Limb sparing	No	Lung	235			627	Stage 3/4	95	Systemic	5746
TARGET-40-0A4I5B	Male			7615	Censored	619	Alive	619	2010	2014	IHRT	Non-metastatic (confirmed)		Leg/Foot	Tibia		Proximal	Limb sparing	No						Stage 3/4	95		5632
TARGET-40-0A4I6O	Male			6738	Relapse	484	Dead	1906	2004	2009	IHRT	Non-metastatic (confirmed)		Leg/Foot	Tibia		Distal	Amputation	No	Lung	484			1906			Systemic	3387
TARGET-40-0A4I8U	Male			7328	Censored	983	Alive	983	2008	2011	IHRT	Non-metastatic (confirmed)		Leg/Foot	Femur		Distal	Limb sparing	No						Stage 1/2	90		1828
TARGET-40-PAPFLB	Male	White	Not Hispanic or Latino	5496							Other osteosarcoma	Non-metastatic (confirmed)		Leg/foot														10561
TARGET-40-PAKFVX	Male	Unknown	Not Hispanic or Latino	5407	Relapse	361	Alive	922	2000	2003	P9754	Non-metastatic (confirmed)		Leg/foot	Femur	Left	Distal	Limb sparing	Yes	Other bone	361					90		3574
TARGET-40-PAKXLD	Female	White	Not Hispanic or Latino	5245	Relapse	578	Alive	2462	2001	2008	P9754	Non-metastatic (confirmed)		Arm/hand	Humerus	Right	Proximal		Yes	Lung	578					30		2023
TARGET-40-PAKZZK	Male	White	Not Hispanic or Latino	4864	Relapse	452	Dead	1515	2001	2005	P9754	Non-metastatic (confirmed)		Leg/foot	Femur	Right	Distal	Limb sparing	Yes	Lung	452			1515		30		3493
TARGET-40-PAKUZU	Male	Asian	Not Hispanic or Latino	7270	None	0	Alive	0	2001	2001	P9851	Non-metastatic (confirmed)		Leg/foot	Femur													3389
TARGET-40-PALECC	Female	Unknown	Hispanic or Latino	3661	Relapse	384	Dead	754	2001	2003	P9851	Non-metastatic (confirmed)		Arm/hand	Arm NOS	Left			Yes	Lung	384			754				3074
TARGET-40-PALFYN	Female	White	Unknown	4841	Relapse	651	Dead	1003	2001	2004	P9851	Non-metastatic (confirmed)		Leg/foot	Femur	Left			Yes		651			1003				2233
TARGET-40-PALHRL	Male	Black or African American	Not Hispanic or Latino	6019	None	4374	Alive	4374	2002	2013	P9851	Metastatic	Lung only	Leg/foot	Femur	Left												1810
TARGET-40-PALKDP	Female	White	Not Hispanic or Latino	3388	None	3282	Alive	3282	2002	2011	P9851	Non-metastatic (confirmed)		Leg/foot	Femur	Left	Distal											8322
TARGET-40-PALKGN	Male	White	Not Hispanic or Latino	6190	None	2122	Alive	2122	2002	2007	P9851	Non-metastatic (confirmed)		Leg/foot	Foot NOS													4083
TARGET-40-PALZGU	Male	White	Not Hispanic or Latino	5603	Relapse	1452	Dead	2882	2002	2010	P9851	Non-metastatic (confirmed)		Leg/foot	Femur	Right	Distal		Yes	Other bone	1452			2882				435
TARGET-40-PAMHLF	Male	White	Not Hispanic or Latino	3233	None	1913	Alive	1913	2003	2008	P9851	Non-metastatic (confirmed)		Leg/foot	Leg NOS													3866
TARGET-40-PAMHYN	Female	Asian	Not Hispanic or Latino	3499	None	3900	Alive	3900	2003	2014	P9851	Non-metastatic (confirmed)		Leg/foot	Leg NOS													8688
TARGET-40-PAMJXS	Male	Black or African American	Not Hispanic or Latino	4100	Relapse	3184	Dead	3862	2003	2014	P9851	Non-metastatic (confirmed)		Leg/foot	Leg NOS				Yes		3184			3976				8265
TARGET-40-PAMTCM	Female	Black or African American	Not Hispanic or Latino	4938	None	3002	Alive	3002	2003	2012	P9851	Non-metastatic (confirmed)		Leg/foot	Leg NOS													6678
TARGET-40-PANGPE	Male	White	Not Hispanic or Latino	4794	SMN	833	Alive	3378	2004	2014	P9851	Non-metastatic (confirmed)		Leg/foot	Femur	Right							833					3566
TARGET-40-PANGRW	Male	White	Not Hispanic or Latino	6088	None	3378	Alive	3378	2004	2014	P9851	Non-metastatic (confirmed)		Leg/foot	Femur	Left	Distal											5398
TARGET-40-PANSEN	Male	White	Not Hispanic or Latino	5234	None	2256	Alive	2256	2005	2011	P9851	Non-metastatic (confirmed)		Leg/foot	Tibia	Left	Proximal											5873
TARGET-40-PANVJJ	Female	White	Unknown	5044	None	3095	Alive	3095	2005	2014	P9851	Non-metastatic (confirmed)		Leg/foot	Tibia	Left												4318
TARGET-40-PANXSC	Male	White	Not Hispanic or Latino	5545	Relapse	366	Alive	1217	2005	2008	P9851	Non-metastatic (confirmed)		Leg/foot	Femur	Right	Distal		Yes	Lung	366	373						3478
TARGET-40-PANZZJ	Male	White	Not Hispanic or Latino	6855	None	1538	Alive	1538	2005	2009	P9851	Non-metastatic (confirmed)		Leg/foot	Leg NOS													4551
TARGET-40-0A4I65	Male			6520	Relapse	1993	Alive	5840			STB	Non-metastatic (Confirmed)	Lung only	Leg/foot	Tibia		PRoximal	Amputation	No	Lung	1993				Stage 1/2	80	Systemic	5897
TARGET-40-0A4I9K	Male			8237		2257	Alive	2257			STB	Non-metastatic (Confirmed)		Leg/foot	Tibia		Proximal	Limb Sparing	No						Stage 1/2	50		3582

## Sheet: Original File
Original File	Date	Data	Contents
TARGET_OS_Toronto_ClinicalData_12_9_2014_harmonized_AD2015.xlsx	2015-01-27	Toronto Discovery	Everything except comment
Toronto_TARGET_Disc_Val_Supress.xlxls	2015-04-14	Toronto Discovery	comment - discovery or validation or suppression annotation
export_20150401_discovery_only.xls	2015-04-01	COG Discovery
export_AOST0331_20150401_discovery_only.xls	2015-04-01	COG Discovery
TARGET OS _DISC SET CLININCAL DATA 2 COG cases VS corrected.xlsx	2018-09-19	Toronto and COG Discovery	corrected some Time to First Event in Days and Overall Survival Time in Days fields
TARGET_OS_Toronto_ClinicalData_11_25_2015_harmonized_rejected_cases	2018-10-09	Toronto Discovery	3 cases unsupressed: TARGET-40-0A4I0S, TARGET-40-0A4I9I, TARGET-40-0A4HYB
